# Supplementary material for: Three-dimensional annealed WO3 nanowire/graphene foam as an electrocatalytic material for all vanadium redox flow batteries
Source: Royal Society of Chemistry journal article supplement (doi:10.1039/c7se00271h), 2017-01-01
Supplement: c7se00271h1.pdf [file c7se00271h1.pdf]

## Supporting Information

### **Three-Dimensional Annealed WO<sub>3</sub> Nanowire/Graphene Foam as an Electrocatalytic Material for an All Vanadium Redox Flow Battery**

Daniel Manaye Kabtamu, Yu-Chung Chang, Guan-Yi Lin, Anteneh Wodaje Bayeh, Chien-Yu  
Chen, Tadele Hunde wondimu and Chen-Hao Wang\*

*Department of Materials Science and Engineering, National Taiwan University of Science and  
Technology, 10607, Taipei, Taiwan.*

\*Corresponding author, E-mail: [chwang@mail.ntust.edu.tw](mailto:chwang@mail.ntust.edu.tw)

Tel: +886-2-2730-3715; Fax: +886-2-2737-6544

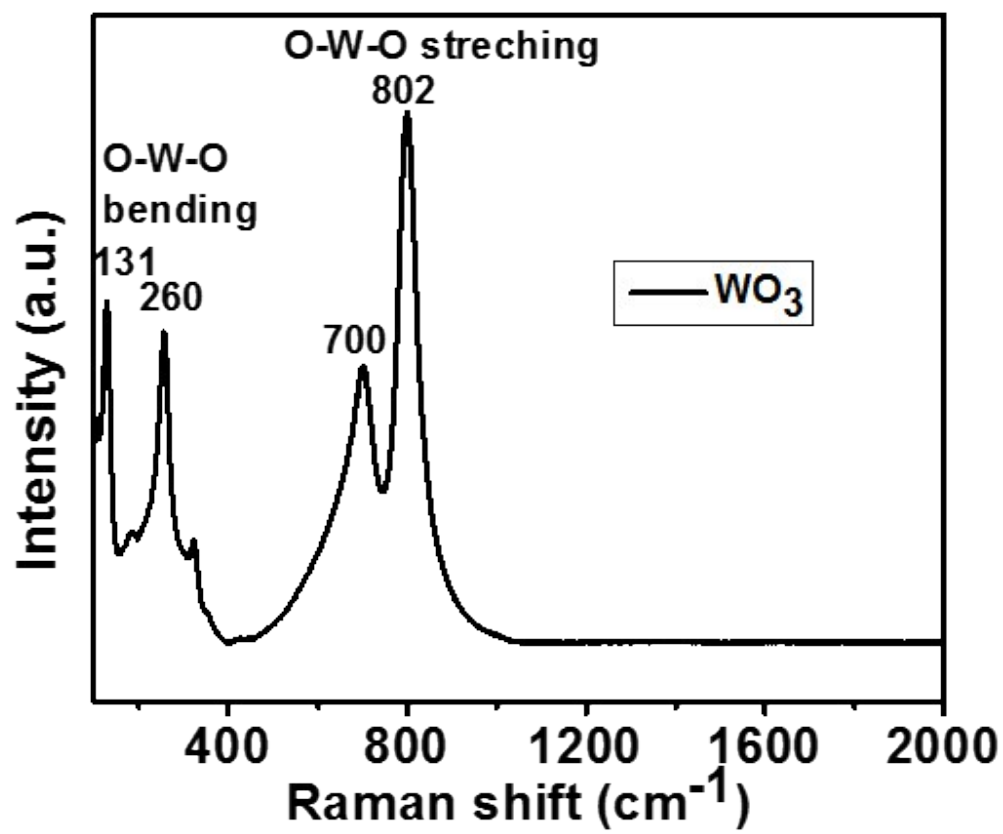

Fig. S1 Raman spectra of WO<sub>3</sub> NWs.

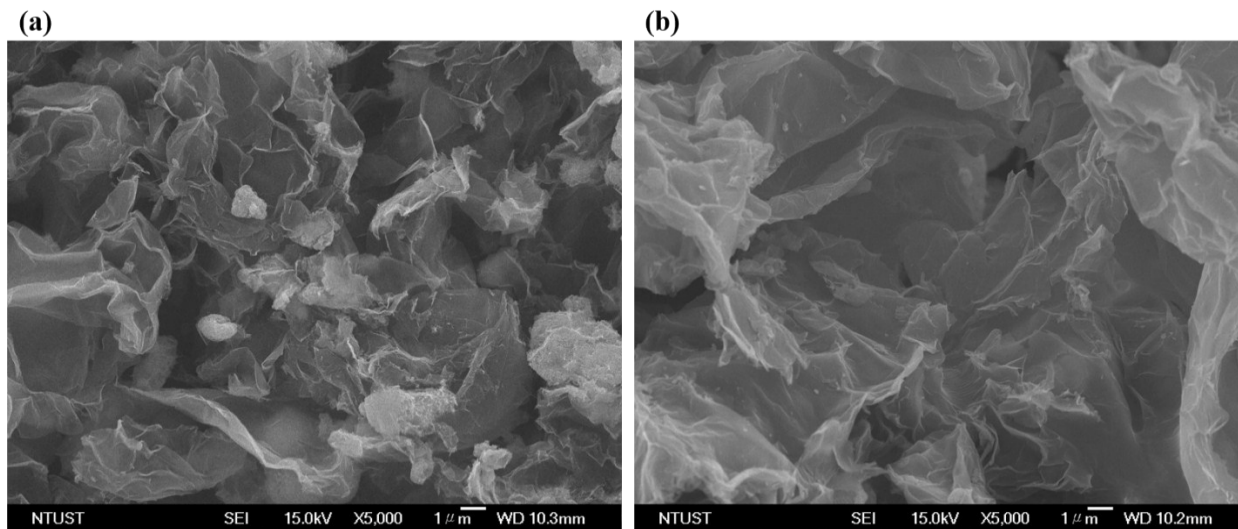

**Fig. S2** Low magnification SEM images of (a) 3D WO<sub>3</sub> NWs/GS foam and (d) 3D annealed WO<sub>3</sub> NWs/GS foam.

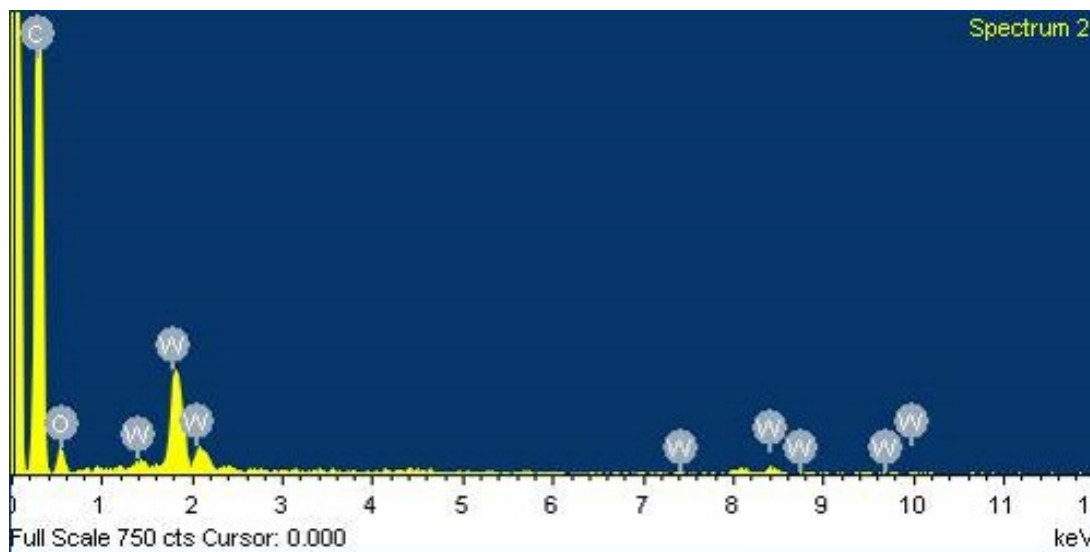

**Fig. S3** EDX images 3D annealed WO<sub>3</sub> NWs/GS foam.

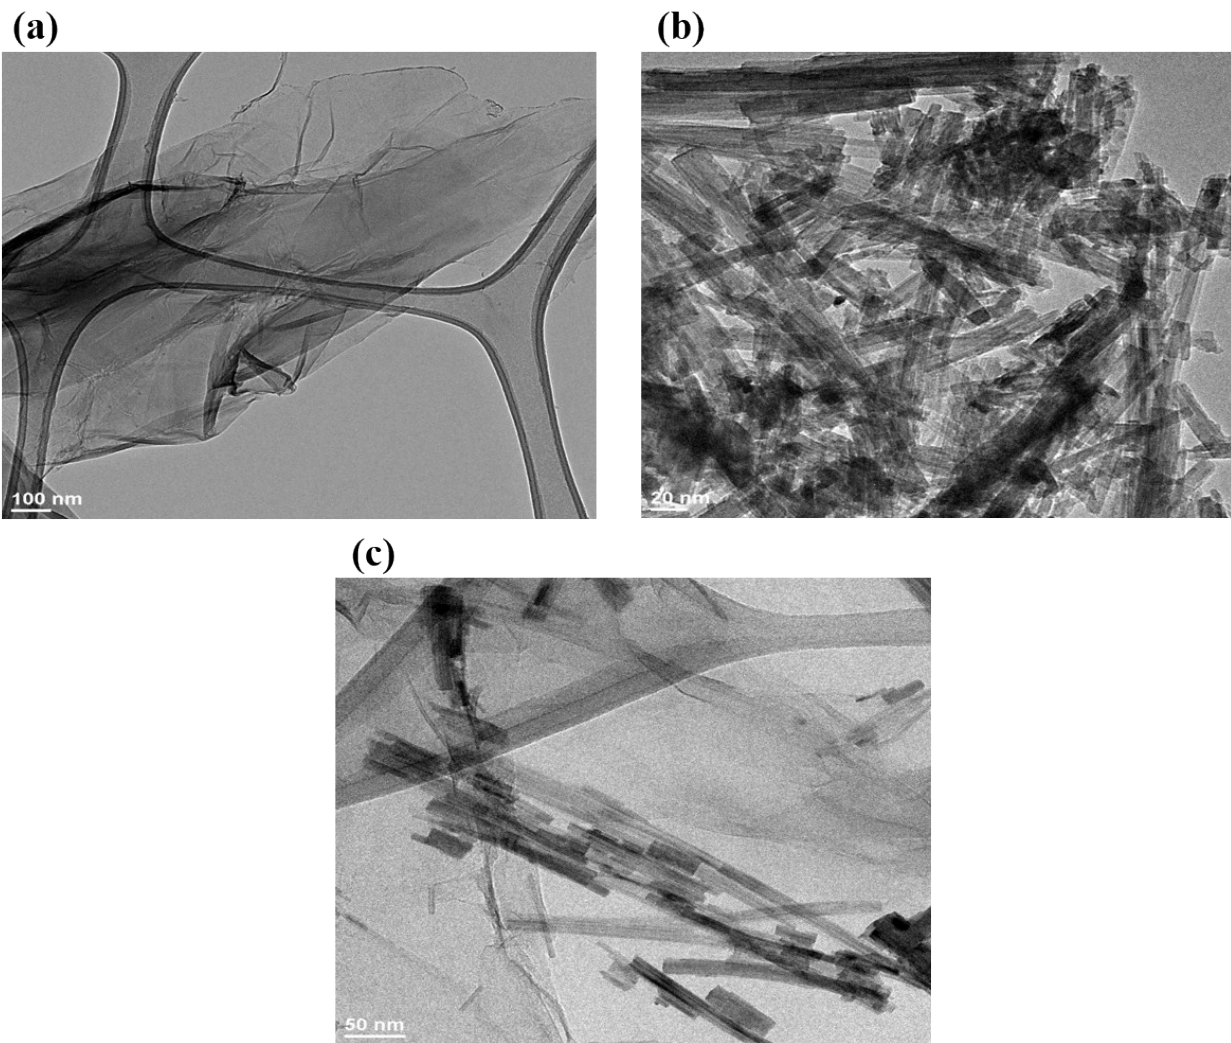

**Fig. S4** TEM images of (a) GO, (b) WO<sub>3</sub> NWs, and (c) 3D WO<sub>3</sub> NWs/GS foam.

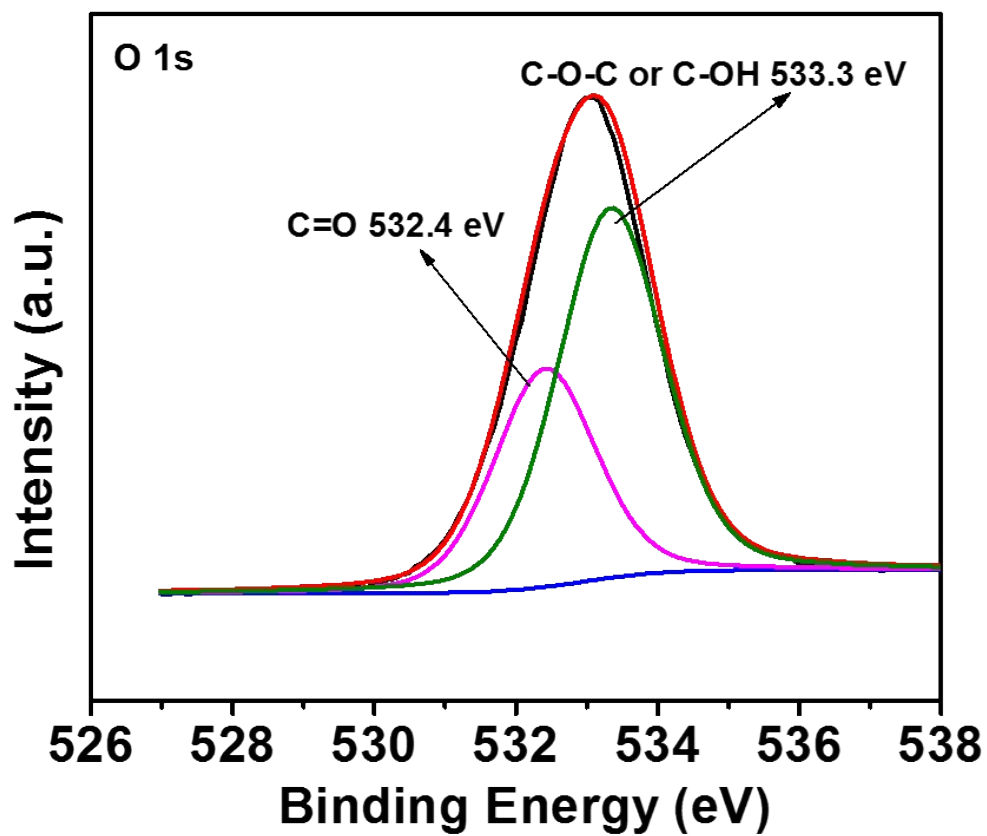

Fig. S5 Narrow-scan O 1s XPS spectra of the GO.

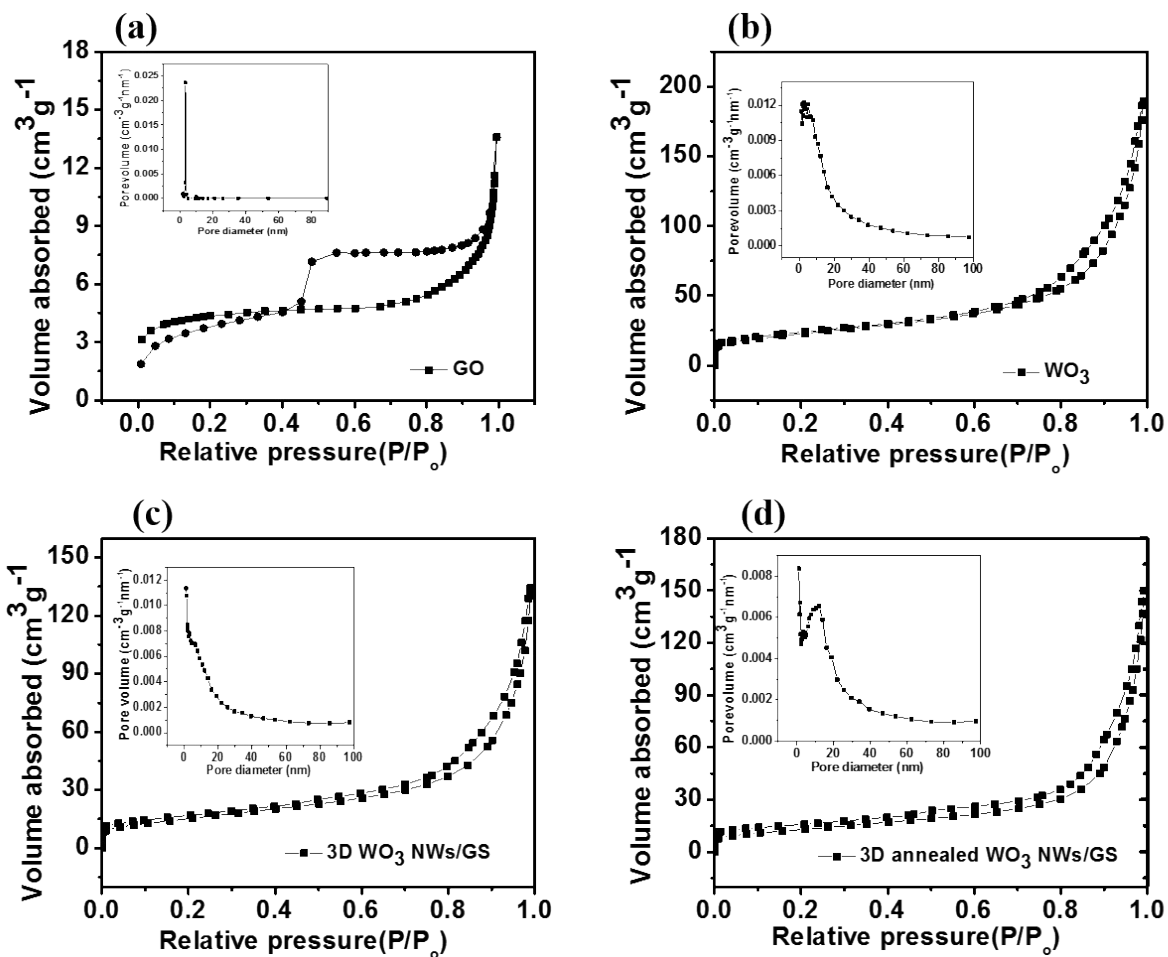

**Fig. S6** Nitrogen adsorption and desorption isotherms and the corresponding pore size distribution curves of (a) GO, (b)  $\text{WO}_3$  NWs, (c) 3D  $\text{WO}_3$  NWs/GS foam, and (d) 3D annealed  $\text{WO}_3$  NWs/GS foam.

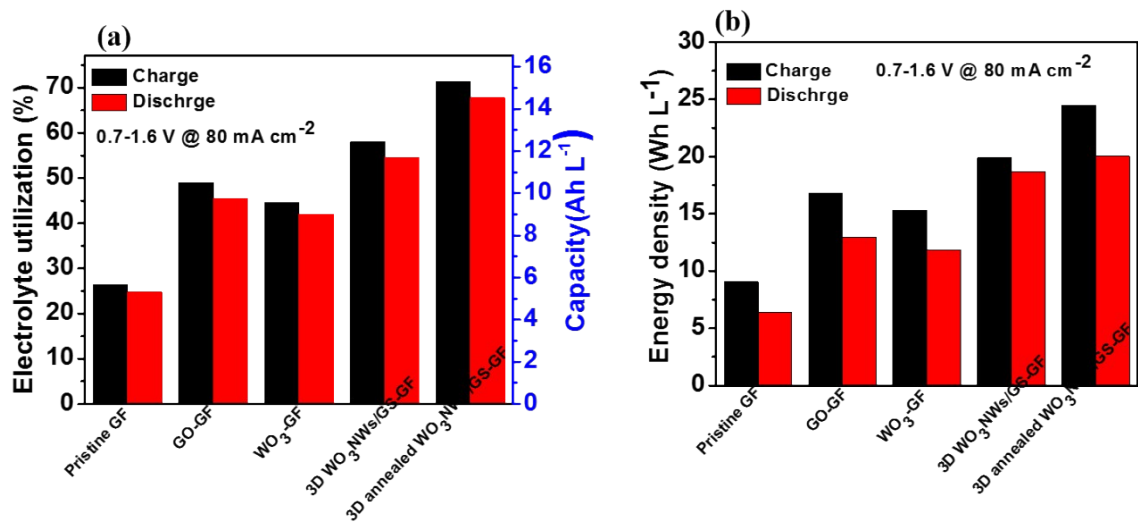

**Fig. S7** Comparison of (a) electrolyte utilization ratio and charge–discharge capacity, (b) charge–discharge energy density of pristine GF, GO-modified GF, WO<sub>3</sub> NWs-modified GF, 3D WO<sub>3</sub> NWs/GS foam-modified GF, and 3D annealed WO<sub>3</sub> NWs/GS foam-modified GF at the current density of 80 mA cm<sup>-2</sup>.

**Table S1.** Comparison of the CE, VE and EE of 3D annealed WO<sub>3</sub> NWs/GS foam-modified GF with previously reported Composite materials as electrode for VRFB Application.

| Materials                                             | Electrolyte                                                    | Current density<br>(mA cm <sup>-2</sup> ) | CE<br>(%) | VE<br>(%) | EE<br>(%) | Ref.      |
|-------------------------------------------------------|----------------------------------------------------------------|-------------------------------------------|-----------|-----------|-----------|-----------|
| <b>3D annealed WO<sub>3</sub> NWs/GS foam</b>         | 1.6 M VOSO <sub>4</sub> + 2.5 M H <sub>2</sub> SO <sub>4</sub> | 160                                       | 98.18     | 68.85     | 67.6      | This work |
| <b>N-doped CNT</b>                                    | 1 M VOSO <sub>4</sub> + 2 M H <sub>2</sub> SO <sub>4</sub>     | 10                                        | 81.3      | 94.7      | 77.0      | 1         |
| <b>Mn<sub>3</sub>O<sub>4</sub>/MWCNTs</b>             | 1.2 M VOSO <sub>4</sub> + 3 M H <sub>2</sub> SO <sub>4</sub>   | 20                                        | 93.50     | 90.53     | 84.65     | 2         |
| <b>MoO<sub>2</sub>/MSU-F-C</b>                        | 1 M VOSO <sub>4</sub> + 1 M H <sub>2</sub> SO <sub>4</sub>     | 40                                        | 87.6      | 89.0      | 78.0      | 3         |
| <b>SWCNT</b>                                          | 1.5 M VOSO <sub>4</sub> + 2 M H <sub>2</sub> SO <sub>4</sub>   | 20                                        | 92.2      | 96.8      | 89.3      | 4         |
| <b>corn-protein-derived N-doped carbon</b>            | 2 M VOSO <sub>4</sub> + 3 M H <sub>2</sub> SO <sub>4</sub>     | 150                                       | 98.0      | 70.0      | 68.6      | 5         |
| <b>WO<sub>3</sub>/SAC</b>                             | 1.5 M VOSO <sub>4</sub> + 3 M H <sub>2</sub> SO <sub>4</sub>   | 50                                        | 94.5      | 85.2      | 80.5      | 6         |
| <b>Pt/MWNTs</b>                                       | 1 M VOSO <sub>4</sub> + 1 M H <sub>2</sub> SO <sub>4</sub>     | 20                                        | 83.88     | 27.55     | 23.11     | 7         |
| <b>Ti:IrO<sub>2</sub>:Ta<sub>2</sub>O<sub>5</sub></b> | 1.7 M VOSO <sub>4</sub> + 4 M H <sub>2</sub> SO <sub>4</sub>   | 40                                        | 90        | 90        | 81.0      | 8         |
| <b>polyol Pt/C</b>                                    | 1 M VOSO <sub>4</sub> + 1 M H <sub>2</sub> SO <sub>4</sub>     | 40                                        | 87.0      | 81.6      | 71.0      | 9         |
| <b>TiO<sub>2</sub>/C</b>                              | 3 M VOSO <sub>4</sub> + 2 M H <sub>2</sub> SO <sub>4</sub>     | 200                                       | 90        | 73        | 65.4      | 10        |
| <b>CNF/CNT</b>                                        | 2 M VOSO <sub>4</sub> + 3 M H <sub>2</sub> SO <sub>4</sub>     | 100                                       | 97.7      | 67.5      | 66.0      | 11        |



## References

1. S. Wang, X. Zhao, T. Cochell and A. Manthiram, *The Journal of Physical Chemistry Letters*, 2012, **3**, 2164-2167.
2. Z. He, L. Dai, S. Liu, L. Wang and C. Li, *Electrochim. Acta*, 2015, **176**, 1434-1440.
3. H. T. Thu Pham, C. Jo, J. Lee and Y. Kwon, *RSC Adv.*, 2016, **6**, 17574-17582.
4. W. Li, J. Liu and C. Yan, *Electrochim. Acta*, 2012, **79**, 102-108.
5. M. Park, J. Ryu, Y. Kim and J. Cho, *Energy Environ. Sci.*, 2014, **7**, 3727-3735.
6. C. Yao, H. Zhang, T. Liu, X. Li and Z. Liu, *J. Power Sources*, 2012, **218**, 455-461.
7. R. H. Huang, C. H. Sun, T. m. Tseng, W. k. Chao, K. L. Hsueh and F. S. Shieu, *J. Electrochem. Soc.*, 2012, **159**, A1579-A1586.
8. S. Chandrabose Raghu, M. Ulaganathan, T. M. Lim and M. Skyllas Kazacos, *J. Power Sources*, 2013, **238**, 103-108.
9. S. Jeong, S. Kim and Y. Kwon, *Electrochim. Acta*, 2013, **114**, 439-447.
10. T. M. Tseng, R. H. Huang, C. Y. Huang, C. C. Liu, K. L. Hsueh and F. S. Shieu, *J. Electrochem. Soc.*, 2014, **161**, A1132-A1138.
11. M. Park, Y. J. Jung, J. Kim, H. Lee and J. Cho, *Nano Lett.*, 2013, **13**, 4833-4839.
